# Supplementary material for: New kinds of organic superacids. Bis(perfluoroalkylsulfonylimino)trifluoromethanesulfonic acids and their trimethylsilyl esters
Source: Royal Society of Chemistry journal article supplement (doi:10.1039/b815155e), 2009-01-01
Supplement: b815155e.pdf [file b815155e.pdf]

## ESI

**Table 1**  $^{29}\text{Si}$ -NMR chemical shifts of trimethylsilyl esters of sulfonic acid  $\text{ROSiMe}_3$

| N  | R                                                                                   | $\delta_{29\text{Si}}$ (ppm) |                                     | -H <sub>o</sub>                 |
|----|-------------------------------------------------------------------------------------|------------------------------|-------------------------------------|---------------------------------|
|    |                                                                                     | Neat                         | $\text{CH}_2\text{Cl}_2$ (50%)      |                                 |
| 1  | 4- $\text{CH}_3\text{C}_6\text{H}_4\text{SO}_2$                                     | 31.62                        | 32.10                               | about<br>6,5-7,5 <sup>(1)</sup> |
| 2  | $\text{CH}_3\text{SO}_2$                                                            | 32.03                        | 32.27                               |                                 |
| 3  | $\text{C}_6\text{H}_5\text{SO}_2$                                                   | 32.19                        | 32.57                               |                                 |
| 4  | 4- $\text{ClC}_6\text{H}_4\text{SO}_2$                                              | 33.03                        | 33.40                               |                                 |
| 5  | $\text{ClSO}_2$                                                                     | 44.36                        | 44.12                               | about<br>13-15 <sup>(2)</sup>   |
| 6  | $\text{C}_4\text{F}_9\text{SO}_2$                                                   | 43.95                        | 44.40                               |                                 |
| 7  | $\text{CF}_3\text{SO}_2$                                                            | 44.10                        | 44.26<br>(42.00 in $\text{CCl}_4$ ) |                                 |
| 1b | 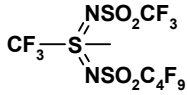  | 62.00                        | 61.50                               | about<br>24-25                  |
| 1a |  | 63.51                        | 62.85<br>(62.00 in $\text{CCl}_4$ ) |                                 |

### Diagram 1

$^{29}\text{Si}$ -NMR chemical shifts of trimethylsilylesters of phenoles  $\text{ROSiMe}_3$  –vs-  $\text{H}_0$  values<sup>1,2</sup>

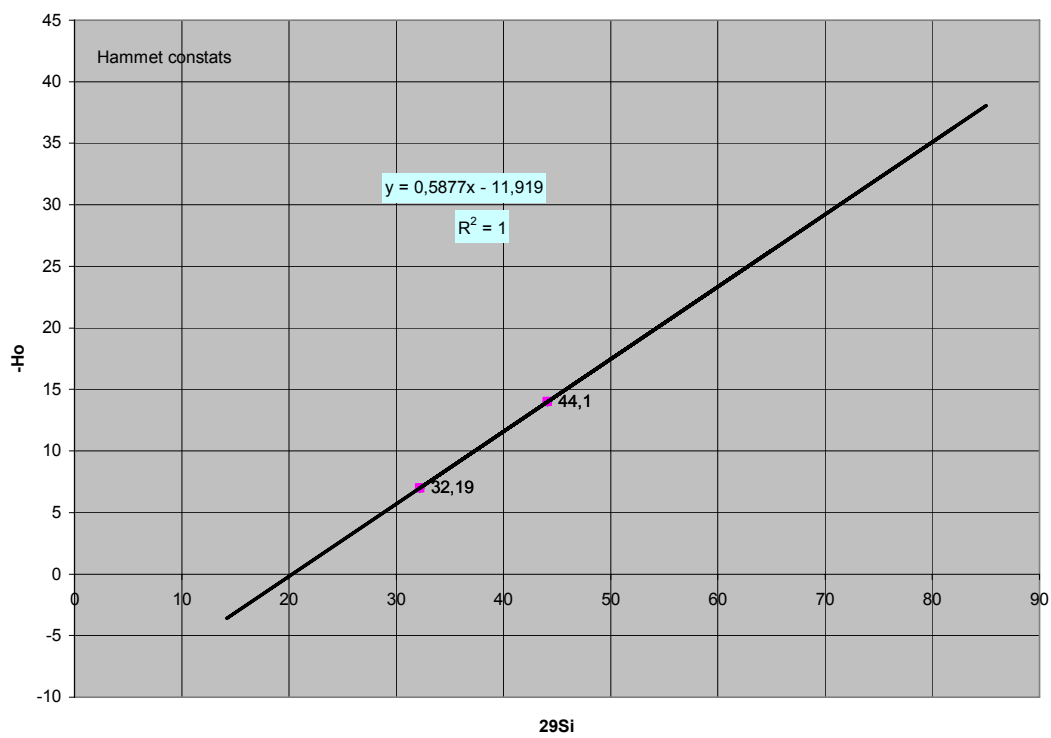

**Table 2**<sup>29</sup>Si-NMR chemical shifts of trimethylsilylestere of phenoles ROSiMe<sub>3</sub> –vs- pK<sub>a</sub> values<sup>3</sup>

| N         | R                                                                                   | δ <sub>29 Si</sub> | pK <sub>a</sub>        |
|-----------|-------------------------------------------------------------------------------------|--------------------|------------------------|
| 1         | C <sub>6</sub> H <sub>5</sub>                                                       | 18,00              | 9,98                   |
| 2         | 2-CH <sub>3</sub> C <sub>6</sub> H <sub>4</sub>                                     | 17,60              | 10,28                  |
| 3         | 3-CH <sub>3</sub> C <sub>6</sub> H <sub>4</sub>                                     | 17,64              | 10,08                  |
| 4         | 4-CH <sub>3</sub> C <sub>6</sub> H <sub>4</sub>                                     | 17,70              | 10,14                  |
| 5         | 4-FC <sub>6</sub> H <sub>4</sub>                                                    | 19,10              | 9,95                   |
| 6         | 4-ClC <sub>6</sub> H <sub>4</sub>                                                   | 19,30              | 9,38                   |
| 7         | 2-BrC <sub>6</sub> H <sub>4</sub>                                                   | 21,10              | 8,44                   |
| 8         | 3-BrC <sub>6</sub> H <sub>4</sub>                                                   | 19,80              | 9,03                   |
| 9         | 4-BrC <sub>6</sub> H <sub>4</sub>                                                   | 19,30              | 9,36                   |
| 10        | 4-IC <sub>6</sub> H <sub>4</sub>                                                    | 19,70              | 9,81                   |
| 11        | 4-(CH <sub>3</sub> )SiOC <sub>6</sub> H <sub>4</sub>                                | 17,39              | 9,96                   |
| 12        | 2-NO <sub>2</sub> C <sub>6</sub> H <sub>4</sub>                                     | 24,00              | 7,23                   |
| 13        | 3-NO <sub>2</sub> C <sub>6</sub> H <sub>4</sub>                                     | 21,86              | 8,40                   |
| 14        | 4-NO <sub>2</sub> C <sub>6</sub> H <sub>4</sub>                                     | 22,30              | 7,15                   |
| 15        | 2,4,6-Cl <sub>3</sub> C <sub>6</sub> H <sub>2</sub>                                 | 24,70              | 6,41                   |
| 16        | 2,4,6-Br <sub>3</sub> C <sub>6</sub> H <sub>2</sub>                                 | 24,80              | 6,70                   |
| 17        | C <sub>6</sub> F <sub>5</sub>                                                       | 28,91              | 6,10                   |
| 18        | C <sub>6</sub> Cl <sub>5</sub>                                                      | 26,45              | 5,26                   |
| 19        | 2,4-(NO <sub>2</sub> ) <sub>2</sub> C <sub>6</sub> H <sub>3</sub>                   | 28,36              | 4,11                   |
| 20        | 2,4,6(NO <sub>2</sub> ) <sub>3</sub> C <sub>6</sub> H <sub>2</sub>                  | 36,16              | 0,71                   |
| <b>1b</b> | 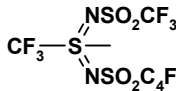 | <b>61,5</b>        | <b>about<br/>-11.8</b> |
| <b>1a</b> |  | <b>62.85</b>       | <b>about<br/>-12.5</b> |

**Diagram 2**<sup>29</sup>Si-NMR chemical shifts of trimethylsilylesters of phenoles ROSiMe<sub>3</sub> –vs- pK<sub>a</sub> values<sup>3</sup>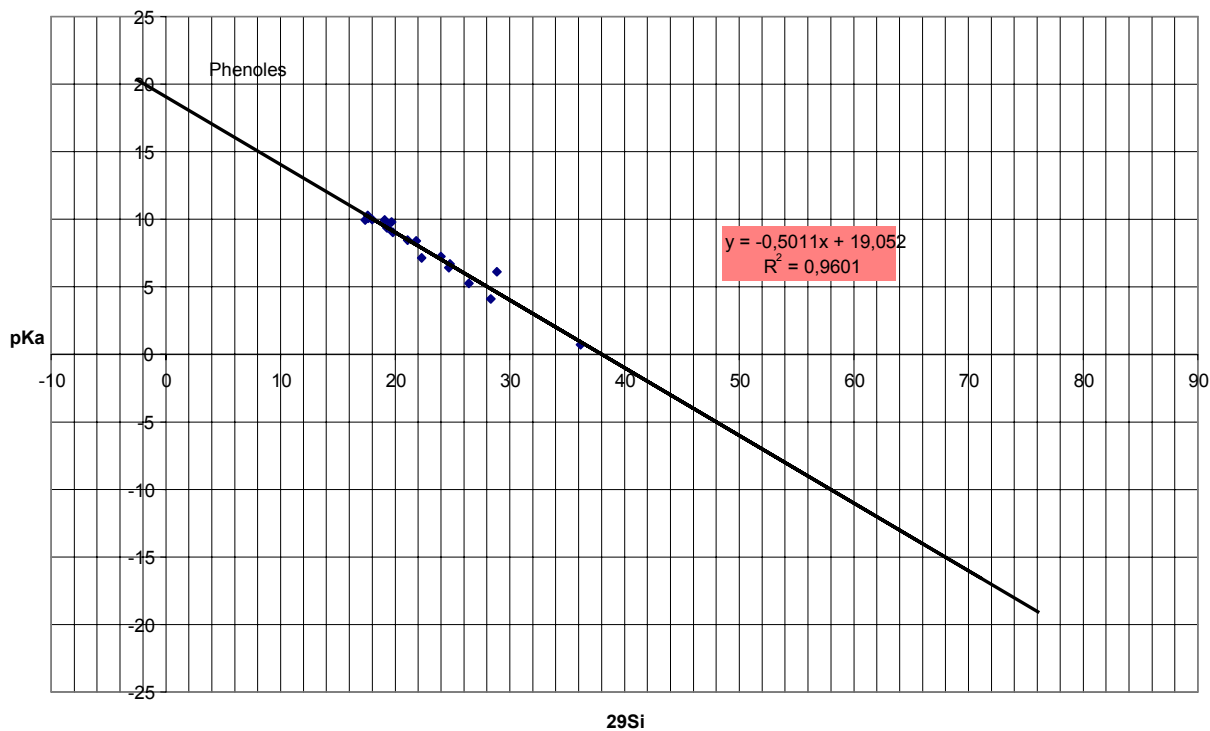**Table 3**<sup>29</sup>Si-NMR chemical shifts of trimethylsilyl esters of carbonic acids and pK<sub>a</sub> values<sup>3</sup>

| N <sup>o</sup> | R                                                 | $\delta_{29\text{Si}}$ | pK <sub>a</sub> |
|----------------|---------------------------------------------------|------------------------|-----------------|
| 1              | C(O)C(CH <sub>3</sub> ) <sub>3</sub>              | 22,6                   | 5,02            |
| 2              | C(O)CH <sub>3</sub>                               | 22,3                   | 4,76            |
| 3              | C(O)CH=CHCH <sub>3</sub>                          | 22,3                   | 4,71            |
| 4              | C(O)CH <sub>2</sub> C <sub>6</sub> H <sub>5</sub> | 24,0                   | 4,30            |
| 5              | C(O)C <sub>6</sub> H <sub>5</sub>                 | 23,6                   | 4,20            |
| 6              | C(O)H                                             | 25,2                   | 3,75            |
| 7              | C(O)CH <sub>2</sub> Br                            | 26,7                   | 2,89            |
| 8              | C(O)CH <sub>2</sub> Cl                            | 26,6                   | 2,86            |
| 9              | C(O)CHCl <sub>2</sub>                             | 30,2                   | 1,23            |
| 10             | C(O)CCl <sub>3</sub>                              | 32,5                   | 0,66            |
| 11             | C(O)CF <sub>3</sub>                               | 33,2                   | 0,22            |

|           |                                                                                                                                            |              |                         |
|-----------|--------------------------------------------------------------------------------------------------------------------------------------------|--------------|-------------------------|
| <b>1b</b> | $\begin{array}{c} \text{NSO}_2\text{CF}_3 \\ \diagup \\ \text{CF}_3-\text{S} \\ \diagdown \\ \text{NSO}_2\text{C}_4\text{F}_9 \end{array}$ | <b>61,5</b>  | <b>about<br/>-11,9</b>  |
| <b>1a</b> | $\begin{array}{c} \text{NSO}_2\text{CF}_3 \\ \diagup \\ \text{CF}_3-\text{S} \\ \diagdown \\ \text{NSO}_2\text{CF}_3 \end{array}$          | <b>62,85</b> | <b>about<br/>-12,54</b> |

**Diagram 3**<sup>29</sup>Si-NMR chemical shifts of trimethylsilyl esters of carbonic acids and pK<sub>a</sub> values<sup>3</sup>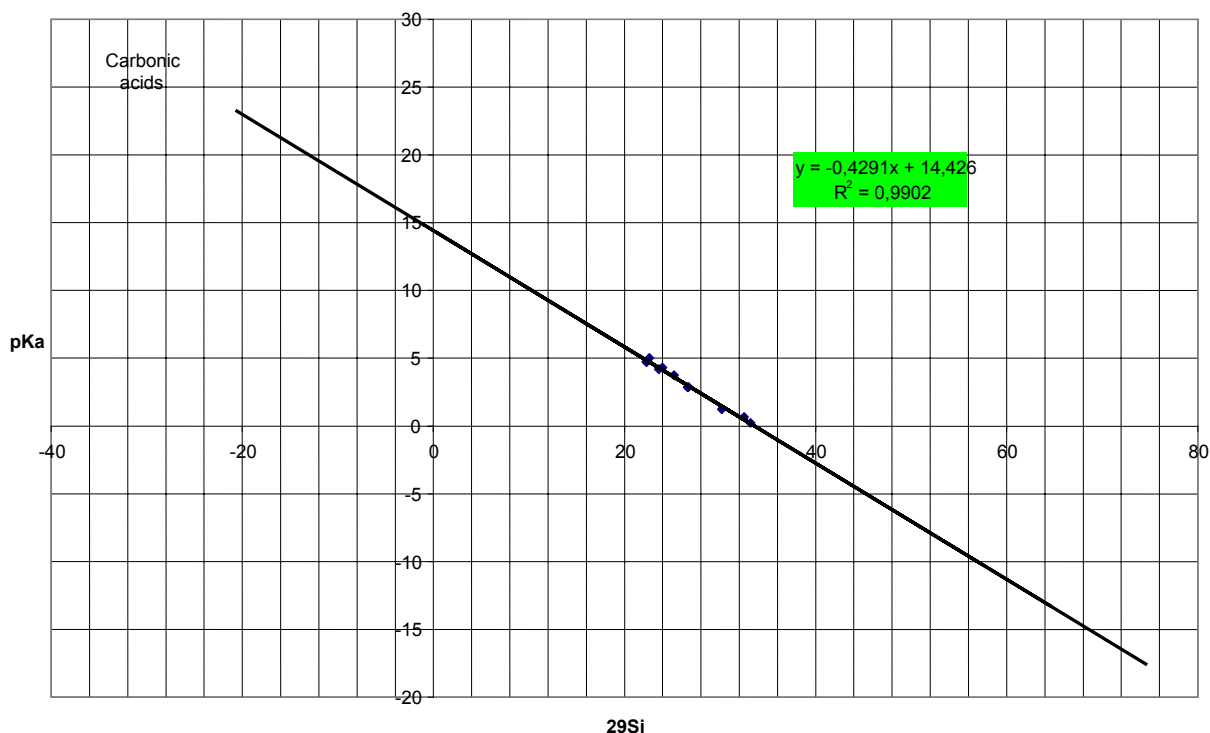**Table 4**<sup>29</sup>Si-NMR chemical shifts of trimethylsilyl esters of an assorted number of acids and pK<sub>a</sub> values<sup>4</sup>

| N  | Trimehtylsilylesters                                                   | $\delta_{29\text{Si}}$ | pKa   | N         | Trimehtylsilylesters                                                                  | $\delta_{29\text{Si}}$ | pKa    |
|----|------------------------------------------------------------------------|------------------------|-------|-----------|---------------------------------------------------------------------------------------|------------------------|--------|
| 1  | (CH <sub>3</sub> ) <sub>3</sub> SiO-SO <sub>2</sub> CF <sub>3</sub>    | 44,6                   | -     | 16        | (CH <sub>3</sub> ) <sub>3</sub> SiI                                                   | 8,6                    | -9,5   |
| 2  | [(CH <sub>3</sub> ) <sub>3</sub> Si]ClO <sub>4</sub>                   | 43,4                   | -7,3  | 17        | [(CH <sub>3</sub> ) <sub>3</sub> Si] <sub>4</sub> SiO <sub>4</sub>                    | 8,0                    | 9,67   |
| 3  | (CH <sub>3</sub> ) <sub>3</sub> SiOOCF <sub>3</sub>                    | 34,3                   | -0,23 | 18        | (CH <sub>3</sub> ) <sub>3</sub> Si(NCO)                                               | 7,0                    | 3,54   |
| 4  | [(CH <sub>3</sub> ) <sub>3</sub> Si] <sub>2</sub> SO <sub>4</sub>      | 33,7                   | -3    | 19        | (CH <sub>3</sub> ) <sub>3</sub> SiOSi(CH <sub>3</sub> ) <sub>3</sub>                  | 6,0                    | 13,99  |
| 5  | (CH <sub>3</sub> ) <sub>3</sub> SiCl                                   | 32,5                   | 0,98  | 20        | (CH <sub>3</sub> ) <sub>3</sub> Si(NCS)                                               | 5,1                    | 0      |
| 6  | -[(CH <sub>3</sub> ) <sub>3</sub> SiO-P(O)O] <sub>3</sub> -            | 31,2                   | 0     | 21        | (CH <sub>3</sub> ) <sub>3</sub> Si(CN)                                                | 12,2                   | 9,28   |
| 7  | (CH <sub>3</sub> ) <sub>3</sub> SiF                                    | 30,5                   | 3,6   |           |                                                                                       |                        |        |
| 8  | (CH <sub>3</sub> ) <sub>3</sub> SiBr                                   | 26,4                   | -2,15 |           |                                                                                       |                        |        |
| 9  | (CH <sub>3</sub> ) <sub>3</sub> SiOOCH <sub>3</sub>                    | 22,0                   | 4,75  |           |                                                                                       |                        |        |
| 10 | [(CH <sub>3</sub> ) <sub>3</sub> SiO] <sub>2</sub> P(O)CH <sub>3</sub> | 21,6                   | 2,38  | <b>1b</b> | 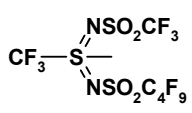 | 61,50                  | -14.25 |
| 11 | [(CH <sub>3</sub> ) <sub>3</sub> Si] <sub>3</sub> PO <sub>4</sub>      | 20,0                   | 2,14  |           |                                                                                       |                        |        |
| 12 | (CH <sub>3</sub> ) <sub>3</sub> SiN <sub>3</sub>                       | 15,3                   | 4,63  |           |                                                                                       |                        |        |
| 13 | (CH <sub>3</sub> ) <sub>3</sub> SiSC <sub>6</sub> H <sub>5</sub>       | 15,3                   | 8,3   |           |                                                                                       |                        |        |
| 14 | (CH <sub>3</sub> ) <sub>3</sub> SiSSi(CH <sub>3</sub> ) <sub>3</sub>   | 12,8                   | 6,95  | <b>1a</b> |  | 62,85                  | -14.88 |
| 15 | [(CH <sub>3</sub> ) <sub>3</sub> SiO] <sub>3</sub> B                   | 12,3                   | 9,18  |           |                                                                                       |                        |        |

**Diagram 4**<sup>29</sup>Si-NMR chemical shifts of trimethylsilyl esters of an assorted number of acids and pK<sub>a</sub> values<sup>4</sup>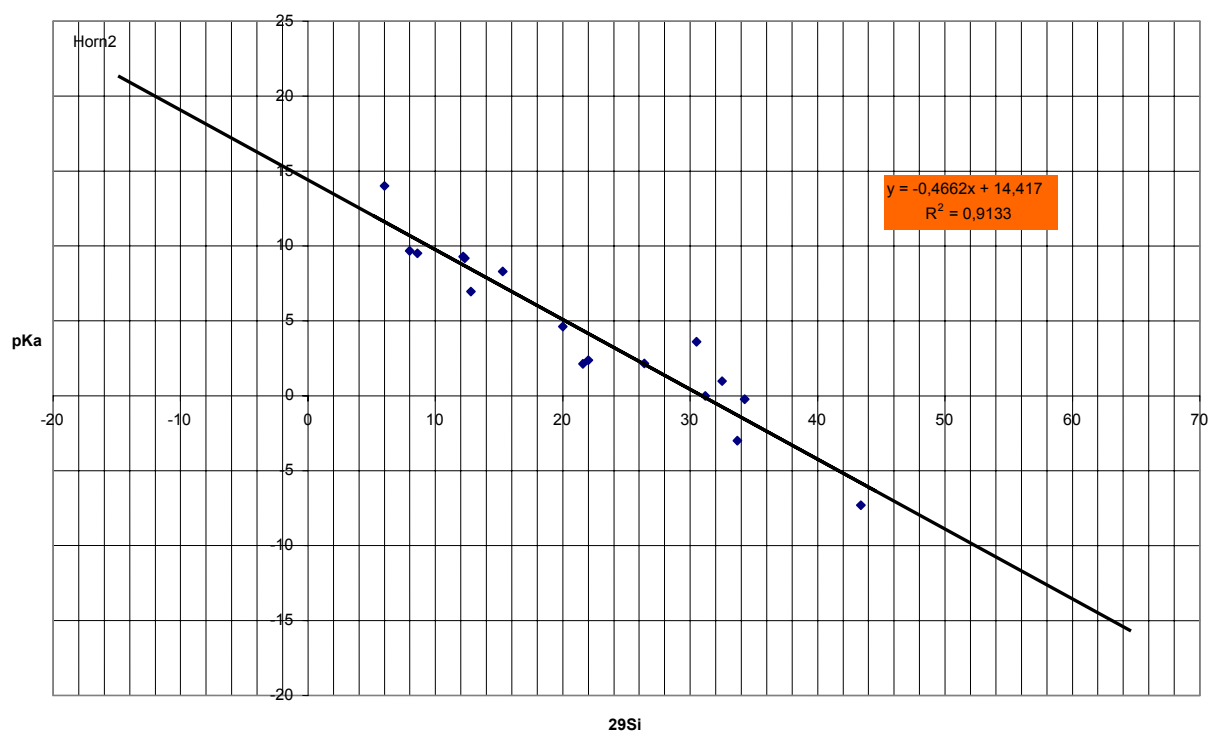**Table 5**<sup>29</sup>Si-NMR chemical shifts of trimethylsilyl esters of sulfonic acids in DCE and pK<sub>a</sub> values in DCE<sup>5</sup>

| N <sup>o</sup> | Trimehtylsilylesters                                                                                                                       | pKa             | δ <sub>29Si</sub> |
|----------------|--------------------------------------------------------------------------------------------------------------------------------------------|-----------------|-------------------|
| 1              | (CH <sub>3</sub> ) <sub>3</sub> SiO-SO <sub>2</sub> C <sub>6</sub> H <sub>5</sub>                                                          | 12,1            | 32,57             |
| 2              | (CH <sub>3</sub> ) <sub>3</sub> SiO-SO <sub>2</sub> CF <sub>3</sub>                                                                        | 7,3             | 44,26             |
| <b>1b</b>      | $\begin{array}{c} \text{NSO}_2\text{CF}_3 \\ \diagup \\ \text{CF}_3-\text{S} \\ \diagdown \\ \text{NSO}_2\text{C}_4\text{F}_9 \end{array}$ | about<br>- 0,22 | 61,5              |
| <b>1a</b>      | $\begin{array}{c} \text{NSO}_2\text{CF}_3 \\ \diagup \\ \text{CF}_3-\text{S} \\ \diagdown \\ \text{NSO}_2\text{CF}_3 \end{array}$          | about<br>-0,33  | 62,85             |

**Diagram 5**

<sup>29</sup>Si-NMR chemical shifts of trimethylsilyl esters of sulfonic acids in DCE and pK<sub>a</sub> values in DCE <sup>5</sup>

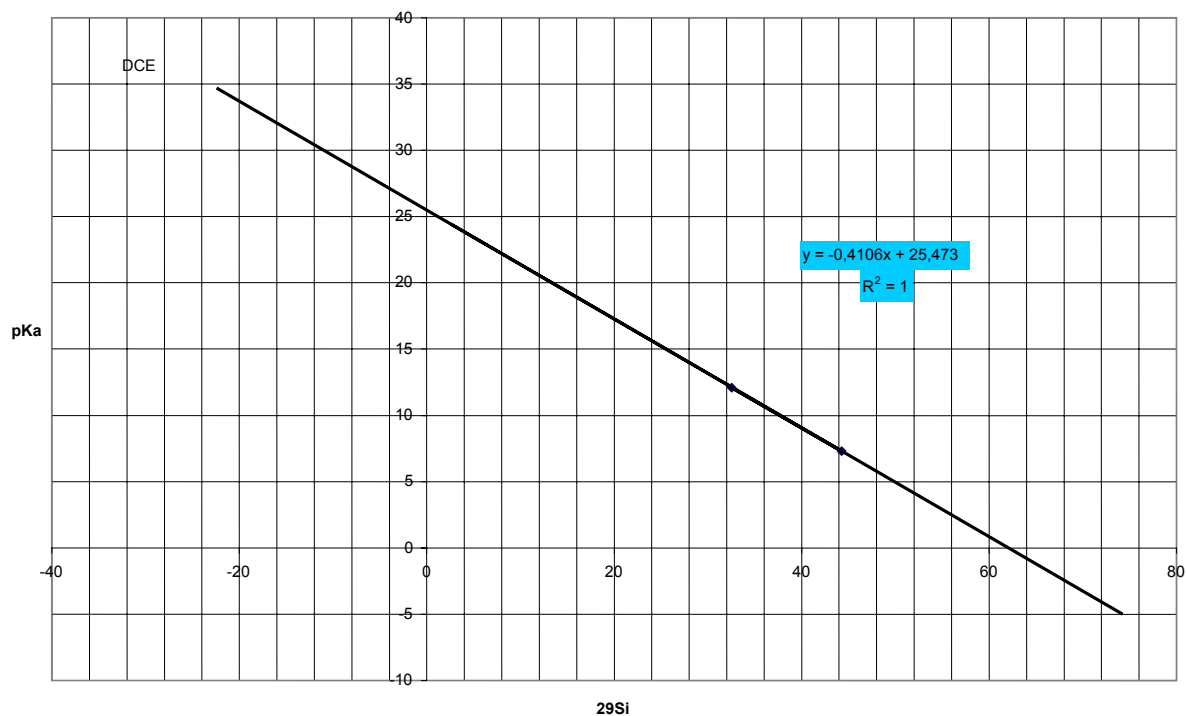**Table 6**

<sup>29</sup>Si-NMR chemical shifts of trimethylsilyl esters of sulphonic acids in AcOH and pK<sub>a</sub> values in acetic acid <sup>6</sup>

| N <sup>o</sup> | Trimehtylsilylesters                                                                | pKa            | δ <sub>29Si</sub> |
|----------------|-------------------------------------------------------------------------------------|----------------|-------------------|
| 1              | (CH <sub>3</sub> ) <sub>3</sub> SiO-SO <sub>2</sub> C <sub>6</sub> H <sub>5</sub>   | 12,1           | 32,57             |
| 2              | (CH <sub>3</sub> ) <sub>3</sub> SiO-SO <sub>2</sub> CF <sub>3</sub>                 | 7,3            | 44,26             |
| <b>1b</b>      | 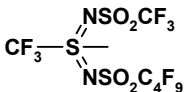 | about<br>0,19  | 61,5              |
| <b>1a</b>      |  | about<br>-0,19 | 62,85             |

**Diagram 6**

<sup>29</sup>Si-NMR chemical shifts of trimethylsilyl esters of sulphonic acids in AcOH and pK<sub>a</sub> values in acetic acid <sup>6</sup>

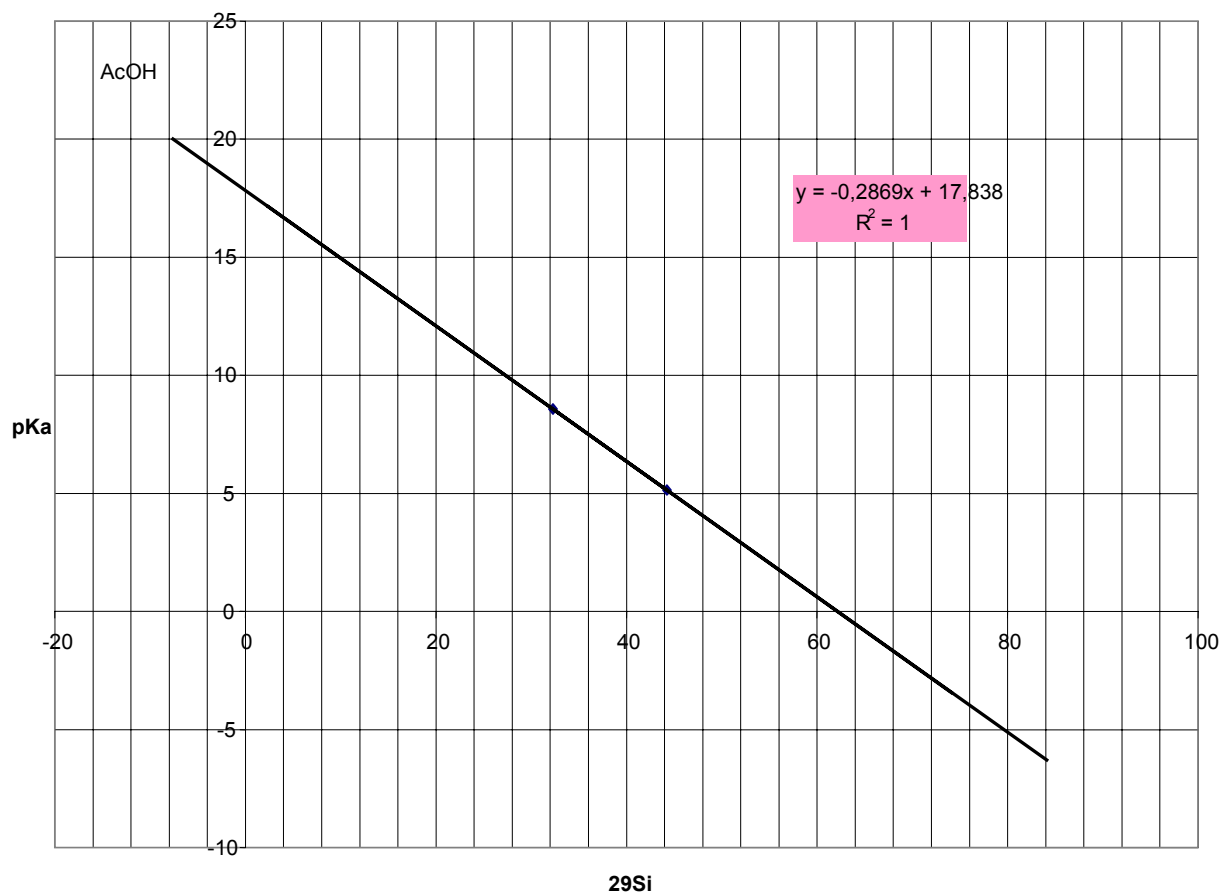**Table 7**

<sup>29</sup>Si-NMR chemical shifts of trimethylsilyl esters of sulphonic acids and pK<sub>a</sub> values from a linear correlation between free energies of hydrolysis of their methyl esters and acidity. <sup>7</sup>

| N         | Trimehtylsilylesters                                                                                                                       | $\delta_{29\text{Si}}$ | pK <sub>a</sub> |
|-----------|--------------------------------------------------------------------------------------------------------------------------------------------|------------------------|-----------------|
| 1         | (CH <sub>3</sub> ) <sub>3</sub> SiO-SO <sub>2</sub> CH <sub>3</sub>                                                                        | 32,27                  | -1,92           |
| 2         | (CH <sub>3</sub> ) <sub>3</sub> SiO-SO <sub>2</sub> C <sub>6</sub> H <sub>5</sub>                                                          | 32,57                  | -2,8            |
| 3         | (CH <sub>3</sub> ) <sub>3</sub> SiO-SO <sub>2</sub> C <sub>6</sub> H <sub>4</sub> -pBr                                                     | 33,4                   | -3,1            |
| 4         | (CH <sub>3</sub> ) <sub>3</sub> SiO-SO <sub>2</sub> CF <sub>3</sub>                                                                        | 44,26                  | -5,9            |
| 5         | (CH <sub>3</sub> ) <sub>3</sub> SiO-SO <sub>2</sub> Cl                                                                                     | 44,12                  | -6,0            |
| <b>1b</b> | $\begin{array}{c} \text{NSO}_2\text{CF}_3 \\ \diagdown \\ \text{CF}_3-\text{S} \\ \diagup \\ \text{NSO}_2\text{C}_4\text{F}_9 \end{array}$ | 61,5                   | about<br>-11,07 |
| <b>1a</b> | $\begin{array}{c} \text{NSO}_2\text{CF}_3 \\ \diagdown \\ \text{CF}_3-\text{S} \\ \diagup \\ \text{NSO}_2\text{CF}_3 \end{array}$          | 62,85                  | about<br>-11,5  |



### Diagram 7

$^{29}\text{Si}$ -NMR chemical shifts of trimethylsilyl esters of sulphonic acids and  $\text{pK}_a$  values from a linear correlation between free energies of hydrolysis of their methyl esters and acidity.<sup>7</sup>

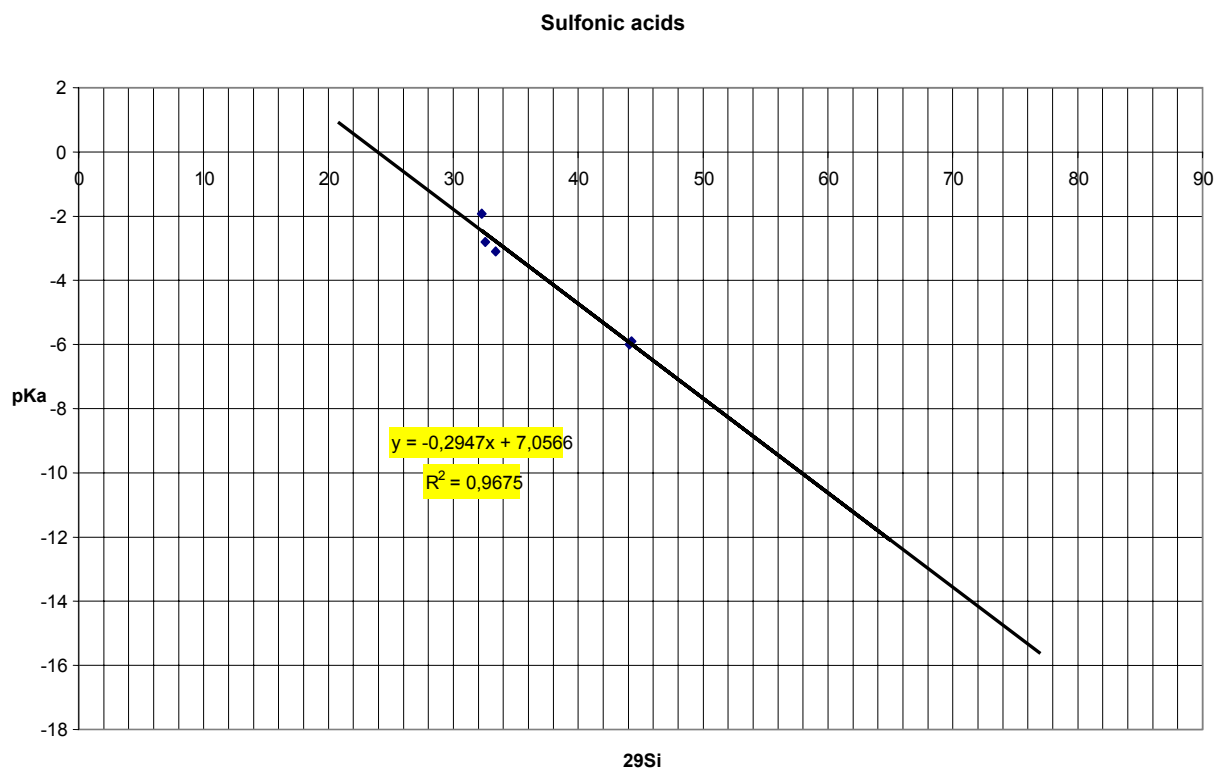

**Table 8**

| <sup>29</sup> Si-NMR<br>esters of sulfonic acids | chemical | N  | Acid                                                                                                                                                 | $\delta_{29\text{ Si}}$ | $\Delta G^\circ$ ,<br>(Kcal/mol) | shifts of trimethylsilyl<br>and $\Delta G^\circ$ values <sup>8</sup> |
|--------------------------------------------------|----------|----|------------------------------------------------------------------------------------------------------------------------------------------------------|-------------------------|----------------------------------|----------------------------------------------------------------------|
|                                                  |          | 1  | CH <sub>3</sub> SO <sub>2</sub> OH                                                                                                                   | 32,27                   | 312,7                            |                                                                      |
|                                                  |          | 2  | CF <sub>3</sub> SO <sub>2</sub> OH                                                                                                                   | 44,26                   | 292,5                            |                                                                      |
|                                                  |          | 3  | ClSO <sub>2</sub> OH                                                                                                                                 | 44,12                   | 287,2                            |                                                                      |
|                                                  |          | 4  | FSO <sub>3</sub> SbF <sub>5</sub> H                                                                                                                  | ----                    | 250.5                            |                                                                      |
|                                                  |          | 1b | $\begin{array}{c} \text{NSO}_2\text{CF}_3 \\ \diagup \\ \text{CF}_3-\text{S}-\text{OH} \\ \diagdown \\ \text{NSO}_2\text{C}_4\text{F}_9 \end{array}$ | 61,5                    | about<br>255,8                   |                                                                      |
|                                                  |          | 1a | $\begin{array}{c} \text{NSO}_2\text{CF}_3 \\ \diagup \\ \text{CF}_3-\text{S}-\text{OH} \\ \diagdown \\ \text{NSO}_2\text{CF}_3 \end{array}$          | 62,85                   | about<br>252.6                   |                                                                      |

**Diagram 8**

<sup>29</sup>Si-NMR chemical shifts of trimethylsilyl esters of sulfonic acids and  $\Delta G^\circ$  values<sup>8</sup>

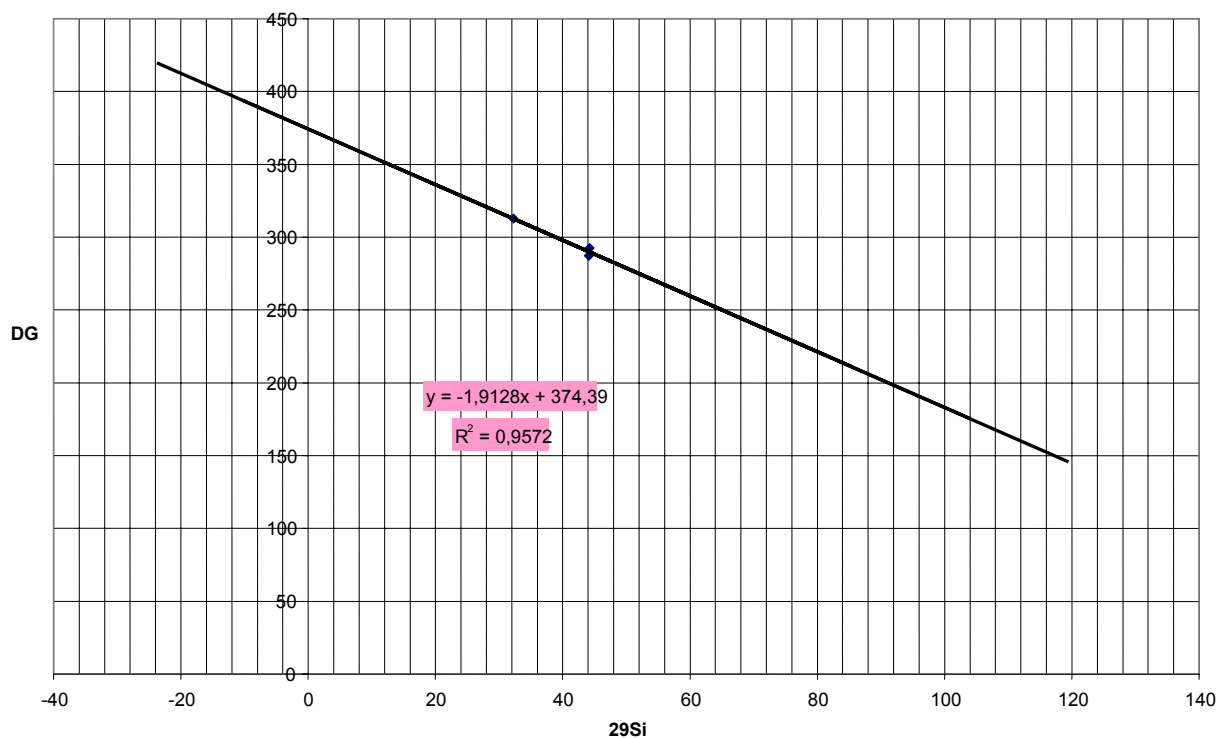

## References

1. H. Cerfontain, A. Koelberg-Telder and C. Kruk, *Tetrahedron Lett.*, 1975, **42**, 3639-3642 and references therein
2. J. Grondin, R. Sagnes and A. Commeyras, *Bull. Soc. Chim. France*, 1976, **11-12**, 1779-1783 and references therein
3. V. A. Pestunovich, M. F. Larin, E. I. Dubinskaya and M. G. Voronkov, *Dokl. Akad. Nauk USSA*, 1977, **233**, 376-381 and references therein
4. H. C. Marsmann and H.-G. Horn, *Z. Natuforsch.*, 1972, **27b**, 1448-1451
5. M. Bos and E. A. M. F. Dahmen, *Analytica Chimica Acta*, 1973, **63**, 185-196
6. G. Feroci and M. Mastragostino, *J. Electroanalytical Chem.*, 1977, **85**, 185-201
7. J. P. Guthrie, *Can. J. Chem.*, 1978, **56**, 2342-2354 and references therein
8. I. A. Koppel, P. Burk, I. Koppel, I. Leito, T. Sonoda and M. Mishima, *J. Am. Chem. Soc.*, 2000, **122**, 5114-5124
